# Supplementary material
Source: ML conference proceedings conference paper supplement (https://openaccess.thecvf.com/content/CVPR2021/html/Ren_Reciprocal_Transformations_for_CVPR_2021_paper.html)
Supplement: Supplementary file 1 [file Ren_Reciprocal_Transformations_for_CVPR_2021_supplemental.zip]

Archive with 1 entries (1 files):
- supp.pdf
